# Supplementary material
Source: PubMed Central journal article supplement (PMC6945471)
Supplement: AnnalsATS.201902-162OC_bostwick_data_supplement.pdf [file AnnalsATS.201902-162OC_bostwick_data_supplement.pdf]

## Online Data Supplement

### Potential Impact of HAP Guidelines on Empiric Antibiotics: An Evaluation of 113 VA Medical Centers

A. Doran Bostwick, Barbara E Jones, MD, MSc, Robert Paine, MD, Matthew Bidwell Goetz, MD, Matthew Samore, MD, Makoto Jones, MD, MSc

Table E1.

| Organisms Recovered from 3,562 Patients with HAP |             |                             |                      |
|--------------------------------------------------|-------------|-----------------------------|----------------------|
| Organism                                         | Sample Type | Number of positive cultures | Proportion Resistant |
| <i>Staphylococcus aureus</i>                     | sputum      | 323                         | 0.45                 |
| <i>Pseudomonas aeruginosa</i>                    | sputum      | 184                         | 0.11                 |
| Genus Klebsiella                                 | sputum      | 154                         | 0.14                 |
| <i>Escherichia coli</i>                          | sputum      | 106                         | 0.06                 |
| <i>Staphylococcus aureus</i>                     | blood       | 100                         | 0.45                 |
| Genus Enterobacter                               | sputum      | 80                          | 0.24                 |
| Genus Serratia                                   | sputum      | 40                          | 0.15                 |
| Genus Klebsiella                                 | blood       | 38                          | 0.05                 |
| <i>Escherichia coli</i>                          | blood       | 37                          | 0.03                 |
| Genus Stenotrophomonas                           | sputum      | 32                          | 0                    |
| Genus Proteus                                    | sputum      | 31                          | 0                    |
| Genus Citrobacter                                | sputum      | 21                          | 0.05                 |
| Genus Acinetobacter                              | sputum      | 12                          | 0                    |
| Genus Enterobacter                               | blood       | 12                          | 0.25                 |
| <i>Pseudomonas aeruginosa</i>                    | blood       | 12                          | 0.25                 |
| Genus Proteus                                    | blood       | <10                         | 0                    |
| Genus Serratia                                   | blood       | <10                         | 0                    |
| Genus Stenotrophomonas                           | blood       | <10                         | 0                    |
| Genus Acinetobacter                              | blood       | <10                         | 0.2                  |
| Genus Citrobacter                                | blood       | <10                         | 0                    |
| Genus Morganella                                 | sputum      | <10                         | 0                    |
| <i>Raoultella planticola</i>                     | sputum      | <10                         | 0                    |
| <i>Pantoea agglomerans</i>                       | sputum      | <10                         | 0.5                  |
| <i>Raoultella ornithinolytica</i>                | sputum      | <10                         | 0                    |
| Genus Providencia                                | sputum      | <10                         | 0                    |
| <i>Hafnia alvei</i>                              | sputum      | <10                         | 1                    |
| Family Enterobacteriaceae                        | sputum      | <10                         | 0                    |

Table E2.

| Organisms Recovered from 31,560 Patients with Secondary Pneumonia |             |                             |                      |
|-------------------------------------------------------------------|-------------|-----------------------------|----------------------|
| Organism                                                          | Sample Type | Number of positive cultures | Proportion Resistant |
| <i>Staphylococcus aureus</i>                                      | sputum      | 960                         | 0.54                 |
| <i>Pseudomonas aeruginosa</i>                                     | sputum      | 646                         | 0.11                 |
| Genus Klebsiella                                                  | sputum      | 475                         | 0.16                 |
| <i>Escherichia coli</i>                                           | sputum      | 304                         | 0.13                 |
| Genus Enterobacter                                                | sputum      | 244                         | 0.26                 |
| <i>Staphylococcus aureus</i>                                      | blood       | 198                         | 0.48                 |
| Genus Stenotrophomonas                                            | sputum      | 145                         | 0.02                 |
| Genus Serratia                                                    | sputum      | 132                         | 0.10                 |
| Genus Klebsiella                                                  | blood       | 97                          | 0.15                 |
| Genus Proteus                                                     | sputum      | 83                          | 0.02                 |
| <i>Escherichia coli</i>                                           | blood       | 82                          | 0.04                 |
| Genus Citrobacter                                                 | sputum      | 64                          | 0.11                 |
| Genus Acinetobacter                                               | sputum      | 63                          | 0.11                 |
| <i>Pseudomonas aeruginosa</i>                                     | blood       | 45                          | 0.09                 |
| Genus Enterobacter                                                | blood       | 30                          | 0.27                 |
| Genus Serratia                                                    | blood       | 18                          | 0.00                 |
| Genus Proteus                                                     | blood       | 14                          | 0.00                 |
| Genus Acinetobacter                                               | blood       | 12                          | 0.08                 |
| Genus Providencia                                                 | sputum      | 12                          | 0.42                 |
| Genus Morganella                                                  | sputum      | 11                          | 0.00                 |
| Genus Stenotrophomonas                                            | blood       | <10                         | 0.00                 |
| Genus Citrobacter                                                 | blood       | <10                         | 0.17                 |
| <i>Raoultella planticola</i>                                      | sputum      | <10                         | 0.00                 |
| <i>Hafnia alvei</i>                                               | sputum      | <10                         | 0.20                 |
| <i>Pantoea agglomerans</i>                                        | sputum      | <10                         | 0.33                 |
| Genus Providencia                                                 | blood       | <10                         | 0.33                 |
| Genus Morganella                                                  | blood       | <10                         | 0.00                 |
| Family Enterobacteriaceae                                         | sputum      | <10                         | 0.00                 |
| <i>Cronobacter sakazakii</i>                                      | sputum      | <10                         | 0.00                 |
| <i>Kluyvera</i> species                                           | sputum      | <10                         | 0.00                 |
| <i>Raoultella ornithinolytica</i>                                 | sputum      | <10                         | 0.00                 |
| <i>Pantoea</i> species                                            | blood       | <10                         | 0.00                 |
| <i>Pantoea</i> species                                            | sputum      | <10                         | 0.00                 |
| <i>Yokenella regensburgei</i>                                     | sputum      | <10                         | 0.00                 |
| <i>Leclercia adecarboxylata</i>                                   | sputum      | <10                         | 0.00                 |
